# Supplementary material for: Cholesterol lowering in diet-induced hypercholesterolemic mice using Lactobacillus bile salt hydrolases with different substrate specificities
Source: Royal Society of Chemistry journal article supplement (doi:10.1039/d3fo04871c), 2024-01-01
Supplement: d3fo04871c2.xlsx [file d3fo04871c2.xlsx]

## Sheet: Table 2
	BSH hydrolysis rate(%)
Strain	GCA			mean	SD	mean±SD	TCA			mean	SD	mean±SD	GDCA			mean	SD	mean±SD	TDCA			mean	SD	mean±SD
NB5462	5.19	4.867	5.68	5.24567	0.334232	5.25±0.33	7.2	7.36	7.18	7.24667	0.0805536	7.25±0.08	3.1	3.27	2.99	3.12	0.0997497	3.12±0.10	5.7	5.24	5.59	5.51	0.196129	5.51±0.20
YB334	54.55	53.28	56.91	54.9133	1.50405	54.91±1.50	94.83	94.29	98.62	95.9133	1.92656	95.91±1.93	41.34	38.47	44.87	41.56	2.26675	41.56±2.27	92.89	91.29	94.3	92.8267	1.22964	92.83±1.23
YB81	94.33	97.28	95.29	95.6333	1.22856	95.63±1.23	3.53	2.74	3.38	3.21667	0.342572	3.22±1.34	68.33	61.28	65.39	65	2.50397	65.00±2.50	6.58	4.28	5.92	5.59333	0.966965	5.59±0.97
C2S	1.85	2.44	1.97	2.08667	0.254602	2.09±0.25	0.66	0.84	0.91	0.803333	0.105304	0.80±0.11	1.12	1.03	1.18	1.11	0.0533854	1.11±0.05	1.46	0.98	1.29	1.24333	0.198718	1.24±0.20
F67A	2.41	3.36	3.87	3.21333	0.604998	3.21±0.60	93.41	94.28	95.69	94.46	0.939468	94.46±0.94	2.48	2.09	2.28	2.28333	0.137901	2.28±0.14	95.36	92.19	94.32	93.9567	1.3194	93.96±1.32
G79A	52.38	55.21	58.38	55.3233	2.4508	55.32±2.45	56.38	62.19	58.38	58.9833	2.40998	58.98±2.41	48.48	44.01	46.91	46.4667	1.60353	46.47±1.60	93.59	90.2	93.13	92.3067	1.50143	92.31±1.50
N174A	31.76	29.44	36.57	32.59	2.96939	32.59±2.97	30.76	28.37	32.36	30.4967	1.63952	30.50±3.64	22.71	20.28	27.97	23.6533	2.77952	23.65±2.78	31.38	28.73	29.1	29.7367	1.17179	29.74±1.17
Q269A	58.2	56.78	60.39	58.4567	1.48491	58.46±1.48	64.2	60.28	66.37	63.6167	2.52022	63.62±1.52	66.59	64.19	69.37	66.7167	1.83305	66.72±1.83	98.34	93.57	92.18	94.6967	2.63798	94.70±2.64

## Sheet: Figure 1A
	Weight gain(g)
Day	ND						HCD						HCD+NB5462						HCD+YB81						HCD+F67A
0	0	0	0	0	0	0	0	0	0	0	0	0	0	0	0	0	0	0	0	0	0	0	0	0	0	0	0	0	0	0
7	0.88	0.66	0.65	0.81	0.64	0.76	1.49	1.36	1.48	1.36	1.41	1.54	1.07	1.72	1.32	1.07	1.16	1.09	0.7	0.33	1.22	1.69	2.01	1.79	0.68	1.04	0.9	0.87	0.74	0.56
14	1.1	1.13	1.25	1.18	0.99	1.28	2	2.93	2.79	2.46	2.95	2.31	1.51	1.77	1.65	1.73	1.69	1.28	1.09	0.89	1.69	1.99	2.18	2.57	1.57	1.43	1.35	1.42	1.21	1.11
21	1.91	1.86	1.74	1.77	1.89	1.86	3.33	3.75	3.29	3.43	3.38	3.6	2.08	2.21	2.03	2.29	2.59	3.33	1.9	1.29	2.19	2.42	2.53	2.8	1.92	1.92	2.45	2.02	2.25	1.65
28	2.51	2.59	2.45	2.57	2.42	2.55	4.75	4.57	4.67	4.65	4.59	4.73	2.66	2.86	2.69	2.78	3.23	4.07	2.97	1.79	2.75	3.99	3.94	3.49	2.44	2.61	2.75	2.33	3.14	2.64
35	2.69	2.91	2.46	2.74	2.68	2.57	5.62	5.43	5.74	5.59	5.46	5.71	4.09	4.28	3.9	3.91	4.09	5.06	3.78	3.03	3.81	4.3	4.08	3.8	2.94	3.07	3.55	3.38	3.48	3.35
42	3.22	3.61	3.07	3.13	3.18	3.63	6.32	6.34	6.85	6.3	6.54	6.86	5.29	5.8	5.24	5.53	5.29	5.55	4.73	4	3.97	4.94	4.66	4.57	3.3	3.41	3.93	3.84	3.87	3.57
49	3.38	3.89	3.42	3.7	3.48	3.49	7.93	8	7.89	7.98	7.92	7.94	7.2	7.11	7.08	7.03	6.96	7.14	5.08	4.23	4.22	5.34	5.18	4.98	3.73	3.64	3.95	3.86	3.91	4.04

## Sheet: Figure 1B
	ND	HCD	HCD+NB5462	HCD+YB81	HCD+F67A
Serum CHOL(mmol/L)	2.93	4.98	4.56	3.89	3.52
	3.78	4.31	3.83	4.37	3.89
	3.68	4.33	4.27	3.96	3.26
	3.77	4.66	3.79	4.5	3.47
	2.86	4.12	4.41	3.73	3.77
	3.76	4.04	5	4.04	4.06
	ND	HCD	HCD+NB5462	HCD+YB81	HCD+F67A
Serum TG(mmol/L)	0.83	1.14	0.95	0.98	0.65
	0.59	1.17	0.92	0.84	0.92
	1.04	1.09	0.94	0.86	1.05
	0.94	1.18	0.93	0.88	1.01
	0.73	1.07	1.01	0.93	0.63
	1.13	1.1	1.05	0.99	0.9
	ND	HCD	HCD+NB5462	HCD+YB81	HCD+F67A
Serum HDL-C(mmol/L)	1.58	2.68	2.15	2.05	2.1
	1.82	2.38	2.19	2.16	1.9
	1.77	2.09	2.12	1.95	2.09
	1.63	2.2	2.05	2.23	1.91
	1.64	1.88	2.08	1.83	1.86
	1.82	2.33	2.33	1.93	2.07
	ND	HCD	HCD+NB5462	HCD+YB81	HCD+F67A
Serum LDL-C(mmol/L)	0.31	0.46	0.32	0.36	0.25
	0.38	0.41	0.27	0.4	0.34
	0.33	0.58	0.37	0.37	0.36
	0.27	0.42	0.33	0.35	0.33
	0.21	0.34	0.36	0.32	0.2
	0.33	0.42	0.49	0.3	0.34

## Sheet: Figure 1C
	ND	HCD	HCD+NB5462	HCD+YB81	HCD+F67A
Liver CHOL(mmol/g)	0.1329	0.2383	0.2747	0.2624	0.1928
	0.1482	0.2517	0.2089	0.1978	0.2132
	0.1338	0.3395	0.2429	0.2382	0.1785
	0.1274	0.2551	0.2377	0.2193	0.1683
	0.1383	0.2411	0.2861	0.2629	0.189
	0.1448	0.2604	0.3008	0.2859	0.1728
	ND	HCD	HCD+NB5462	HCD+YB81	HCD+F67A
Liver TG(mmol/g)	0.1329	0.2194	0.2183	0.2247	0.1413
	0.1478	0.2847	0.1838	0.166	0.1492
	0.1216	0.1948	0.1949	0.1838	0.1873
	0.1381	0.2644	0.2132	0.1784	0.1538
	0.1227	0.3193	0.2371	0.1695	0.1712
	0.1119	0.2618	0.2264	0.2193	0.1738

## Sheet: Figure 2A
	Ileum contents bile acid(mg/kg)
	ND						HCD						HCD+NB5462
Conjugated BA	400.712	243.875	291.963	285.725	331.04	347.574	431.868	913.87	378.888	497.327	510.572	650.216	7979.23	6993.22	7054.77	6211.88	7533.4	8865.11
Unconjugated BA	34.418	32.932	66.707	48.223	40.592	30.204	5.102	5.394	3.446	6.165	5.711	4.793	8.02669	1.14468	6.37505	1.99728	3.69582	3.42785
Total BA	435.129	276.807	358.67	333.948	371.632	377.778	436.97	919.264	382.335	503.492	516.283	655.009	7987.26	6994.36	7061.14	6213.88	7537.1	8868.54
	HCD+YB81						HCD+F67A
Conjugated BA	7138.83	7119.93	8372.43	7283.2	7046.09	7434.75	7034.19	6420.21	6294.74	6555.74	6736.72	6147.04
Unconjugated BA	3.91572	7.33654	8.85409	12.7026	21.8451	9.93545	1157.62	1661.19	2092.5	1344.41	1923.69	1310.13
Total BA	7142.75	7127.26	8381.29	7295.9	7067.93	7444.69	8191.81	8081.4	8387.24	7900.15	8660.41	7457.17

## Sheet: Figure 2B
	Ileum contents bile acid(mg/kg)
	ND						HCD						HCD+NB5462
TCA	1.743	2.046	2.099	1.839	1.902	1.917	2.237	3.164	1.785	1.972	2.184	2.959	3132.63	2419.49	3463.13	3394.6	3340.76	3768.69
CA	33.318	31.366	65.694	47.192	39.424	29.048	3.006	3.933	2.369	4.728	3.893	2.681	7.67968	0.468384	5.46175	1.55011	2.93582	2.42548
	HCD+YB81						HCD+F67A
TCA	2751.11	2795.85	3896.78	2427.35	3148.99	2866.27	2653.9	2164.38	2191.87	2187.81	2112.9	3176.09
CA	3.52086	6.88697	7.80591	11.8745	20.5309	8.23467	1145.95	1576.66	2040.49	1315.51	1904.27	1279.34

## Sheet: Figure 2C
Hepatic mRNA expression
（relative fold change compared to HCD group）
	HCD+NB5462						HCD+YB81						HCD+F67A
FXR	2.04	2.08	2.07	2.16	2.24	1.84	2.56	2.47	2.23	2.06	2.18	2.76	2.37	3.03	2.43	2.59	2.47	2.89
SHP	1.38	0.95	0.71	1.02	1.06	0.86	1.51	1.4	2	1.4	0.93	1	1.29	1.19	1.64	1.95	0.66	1.28
CYP7A1	1.5	1.19	1.85	1.92	1.52	1.01	1.21	1.83	1	1.29	2.1	2.89	2.19	2.63	2.49	3.08	2.43	2.1
CYP27A1	1.22	1.18	0.95	0.92	1.17	0.69	1.41	1.15	1.39	0.87	0.66	0.91	1.51	1.23	0.73	0.89	1.03	1.15
CYP8B1	1.12	1.04	1.87	1.94	1.74	1.8	1.4	1.46	2.01	1.09	1.98	2	2.28	2.41	1.85	1.71	2.39	1.94

## Sheet: Figure 2D
Ileal mRNA expression
（relative fold change compared to HCD group）
	HCD+NB5462						HCD+YB81						HCD+F67A
FXR	0.74	0.68	0.75	0.76	0.78	0.73	0.72	0.69	0.7	0.68	0.64	0.69	0.45	0.46	0.47	0.42	0.55	0.41
FGF15	0.67	0.54	0.58	0.58	0.64	0.62	0.65	0.5	0.58	0.62	0.65	0.52	0.23	0.18	0.28	0.19	0.26	0.29
IBABP	0.79	0.74	0.66	0.58	0.71	0.82	0.72	0.64	0.48	0.88	0.63	0.59	0.46	0.67	0.38	0.76	0.48	0.52

## Sheet: Figure 3A
	Weight gain(g)
Day	ND						HCD						HCD+NB5462						HCD+YB81
0	0	0	0	0	0	0	0	0	0	0	0	0	0	0	0	0	0	0	0	0	0	0	0	0
7	0.5	0.5	0.5	0.5	0.5	0.5	0.5	1	1	0.5	0.5	1	1	0.5	0.5	0.5	0.5	0.5	0.95	0.5	0.5	0.5	0.5	0.5
14	1.13	0.86	0.99	0.82	1.17	0.98	1.32	1.92	1.97	1.66	1.71	1.84	1.61	2.03	1.11	1.03	1.1	0.92	1	0.85	0.73	0.98	1.02	1.05
17	1.41	1.22	1.28	1.26	1.34	1.32	2.17	2.29	2.16	2.28	2.15	2.24	1.93	2.29	1.46	1.36	1.58	1.32	1.05	0.95	1.03	1.16	1.12	1.95
21	1.74	1.55	1.68	1.67	1.53	1.69	2.56	2.74	2.87	2.83	2.56	2.82	2.14	2.52	1.81	1.76	1.89	1.78	1.1	1.52	1.57	1.66	1.92	2.37
24	2.07	2.06	1.95	1.97	1.92	2.05	2.98	2.93	3.01	2.88	2.97	3.06	2.35	2.63	2.13	1.97	2.19	2.08	1.83	1.86	2.12	1.99	2.08	2.68
28	2.09	2.28	2.44	2.31	2.4	2.19	3.65	3.47	3.73	3.52	3.62	3.72	2.99	3.39	2.83	2.52	2.5	2.72	2	2.18	2.24	2.07	2.36	3.01
31	2.53	2.38	2.54	2.43	2.58	2.44	3.71	3.8	4.1	3.77	4.03	3.92	3.62	3.58	3.06	2.94	2.79	3.32	2.5	2.35	2.71	2.71	2.77	3.31
35	2.69	2.75	2.96	2.72	2.83	2.94	3.98	4.01	4.39	4.12	4.38	3.88	3.46	4.04	3.09	3.23	3.14	3.91	2.52	2.36	2.87	3.06	2.88	3.39
38	3.11	3.35	3.16	3.26	3.22	3.08	4.12	4.17	4.64	4.31	4.45	4.33	4.14	4.41	3.73	3.87	3.49	4.23	2.86	2.54	3.52	3.13	2.93	3.41
42	3.37	3.62	3.46	3.33	3.48	3.59	4.69	4.53	4.96	4.73	4.59	4.9	4.42	4.8	4.5	4.01	3.81	4.51	3.03	3.06	3.66	3.54	3.42	4.23
49	3.68	4.02	3.57	3.47	3.75	3.8	4.99	5.21	5.48	5.23	5.18	5.33	4.95	5.47	4.78	4.38	4.19	4.91	3.73	3.46	3.96	3.88	3.54	4.43

## Sheet: Figure 3B
	ND	HCD	HCD+NB5462	HCD+YB81
Serum CHOL(mmol/L)	2.33	3.9	3.222	2.88
	2.08	3.74	3.46	2.85
	2.08	3.95	3.8	2.99
	2.16	3.83	3.77	3.15
	2.25	3.76	3.56	3.19
	2.31	3.7	3.59	2.77
Serum TG(mmol/L)	ND	HCD	HCD+NB5462	HCD+YB81
	0.99	0.96	0.92	1
	1.02	0.9	1.05	0.9
	0.98	0.85	0.87	0.97
	0.96	0.88	0.86	1.15
	1.03	0.93	0.96	1.06
	1.01	0.98	0.99	1.01
Serum HDL-C(mmol/L)	ND	HCD	HCD+NB5462	HCD+YB81
	1.2	1.53	1.55	1.58
	1.08	1.68	1.51	1.55
	1.07	1.7	1.51	1.43
	1.13	1.62	1.65	1.56
	1.19	1.71	1.56	1.44
	1.07	1.58	1.65	1.65
Serum LDL-C(mmol/L)	ND	HCD	HCD+NB5462	HCD+YB81
	0.25	0.47	0.41	0.35
	0.19	0.5	0.39	0.33
	0.24	0.54	0.48	0.34
	0.23	0.41	0.43	0.42
	0.18	0.49	0.53	0.51
	0.27	0.44	0.49	0.36

[truncated: 6 more sheets: Figure 3C, Figure 6A, Figure 6B, Figure 6C, Figure 6D, Figure S5]
